# Supplementary material for: Synthesis of cubic ordered mesoporous YPO4:Ln3+ and their photoluminescence properties
Source: Royal Society of Chemistry journal article supplement (doi:10.1039/b911464e), 2009-01-01
Supplement: b911464e.pdf [file b911464e.pdf]

**# Electronic Supplementary Information (ESI):**

**Synthesis of Cubic Ordered Mesoporous  $\text{YPO}_4\text{:Ln}^{3+}$  and Their  
Photoluminescence Properties**

*Qiuling Luo*<sup>a</sup>, *Shaodian Shen*<sup>b</sup>, *Guanzhong Lu*<sup>a,b\*</sup>, *Xiuzhen Xiao*<sup>a</sup>, *Dongsen Mao*<sup>b</sup>, *Yanqin Wan*<sup>a</sup>

<sup>a</sup> Key Laboratory for Advanced Materials and Research Institute of Industrial Catalysis, East China University of Science and Technology, Shanghai 200237, P. R. China;

<sup>b</sup> Research Institute of Applied Catalysis, Department of Chemical Engineering, Shanghai Institute of Technology, Shanghai 200235, P. R. China

Corresponding Author: Guanzhong Lu, Tel: +86-21-64252923. Fax: +86-21-64253703. E-mail

Address: [gzhlu@ecust.edu.cn](mailto:gzhlu@ecust.edu.cn) (G. Z. Lu)

**Figure ESI 1.** HRTEM image of mesoporous  $\text{YPO}_4$  material.

**Figure ESI 2.** EDS of cubic ordered mesoporous  $\text{YPO}_4$  material.

**Figure ESI 3.** Small-angle XRD patterns of mesoporous  $\text{YPO}_4$  and  $\text{YPO}_4\text{:Ln}^{3+}$ .

**Figure ESI 4.** Wide-angle XRD patterns of mesoporous  $\text{YPO}_4$  and  $\text{YPO}_4\text{:Ln}^{3+}$ .

**Table ESI 1.** Physisorption data of mesoporous  $\text{YPO}_4\text{:Ln}^{3+}$  materials.

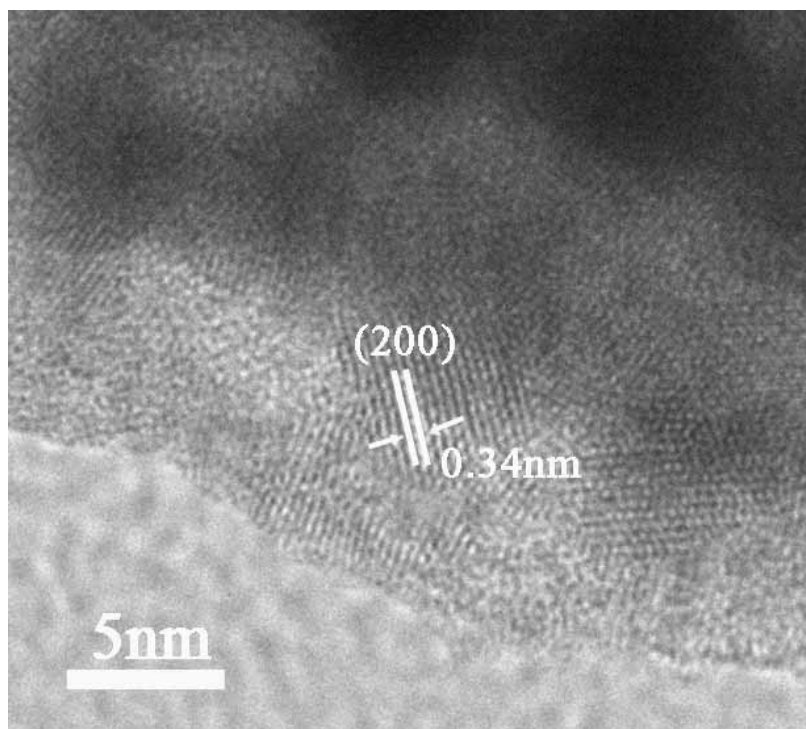

**Figure ESI 1.** HRTEM image of mesoporous YPO<sub>4</sub> material.

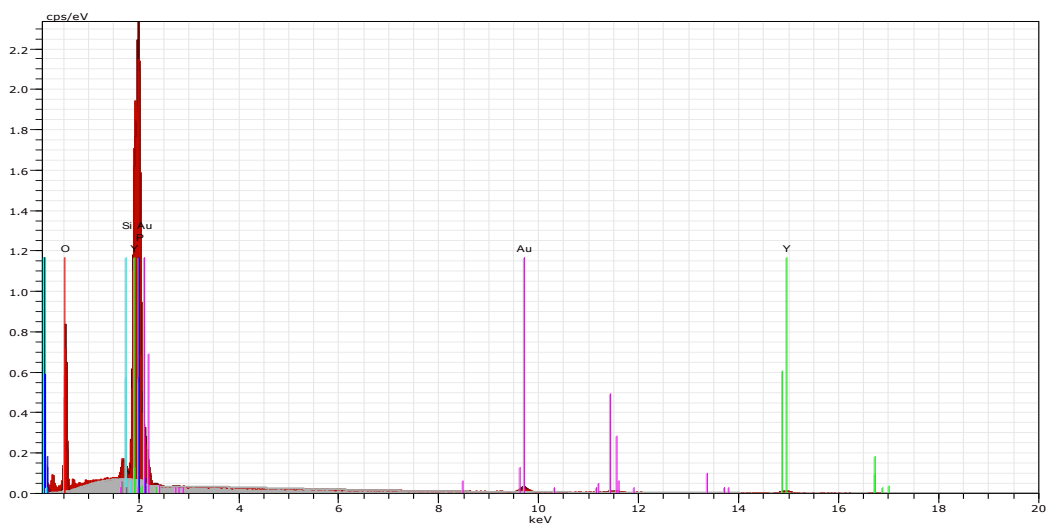

**Figure ESI 2.** EDS of cubic ordered mesoporous YPO<sub>4</sub> material.

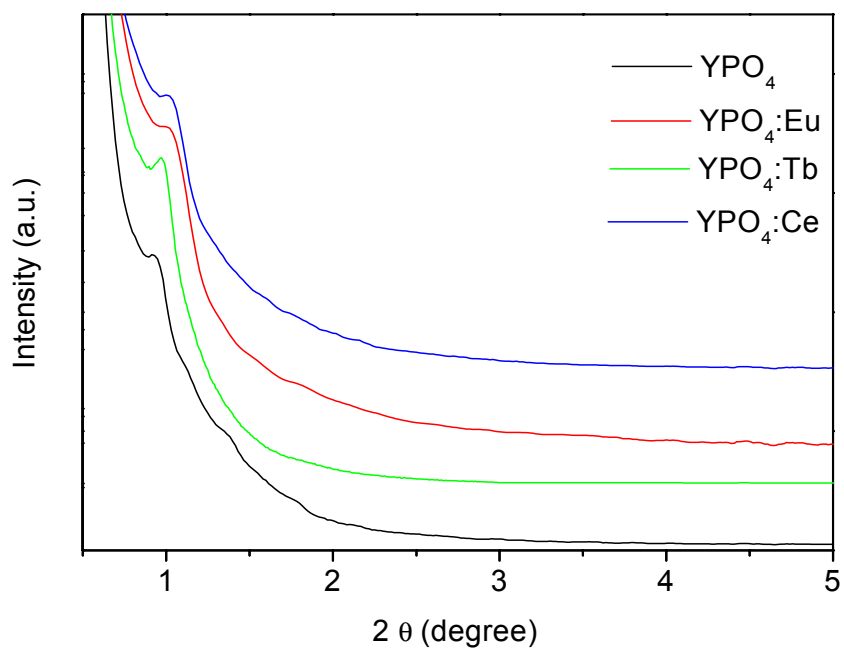

**Figure ESI 3.** Small-angle XRD patterns of cubic ordered mesoporous  $\text{YPO}_4$ ,  $\text{YPO}_4:5\%\text{Eu}^{3+}$ ,  $\text{YPO}_4:5\%\text{Tb}^{3+}$ , and  $\text{YPO}_4:5\%\text{Ce}^{3+}$ .

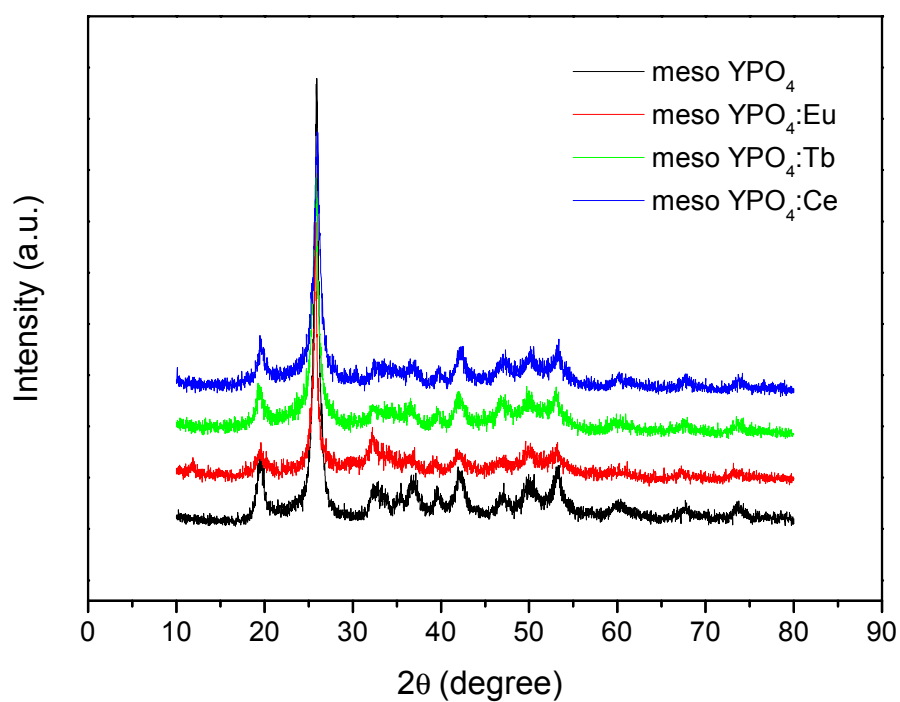

**Figure ESI 4.** Wide-angle XRD pattern of cubic ordered mesoporous  $\text{YPO}_4$ ,  $\text{YPO}_4:5\%\text{Eu}^{3+}$ ,  $\text{YPO}_4:5\%\text{Tb}^{3+}$ , and  $\text{YPO}_4:5\%\text{Ce}^{3+}$ .

**Table ESI 1.** Textual structure properties of cubic ordered mesoporous  $\text{YPO}_4$ ,  $\text{YPO}_4:\text{Eu}^{3+}$ ,  $\text{YPO}_4:\text{Tb}^{3+}$ , and  $\text{YPO}_4:\text{Ce}^{3+}$ .

| Sample                                | BET surface area<br>( $\text{m}^2/\text{g}$ ) | Pore volume<br>( $\text{cm}^3/\text{g}$ ) | Pore size<br>(nm) | Wall thickness<br>(nm) |
|---------------------------------------|-----------------------------------------------|-------------------------------------------|-------------------|------------------------|
| Meso $\text{YPO}_4$                   | 114                                           | 0.15                                      | 4.3               | 4.1                    |
| Meso $\text{YPO}_4:5\%\text{Eu}^{3+}$ | 104                                           | 0.16                                      | 4.0               | 4.0                    |
| Meso $\text{YPO}_4:5\%\text{Tb}^{3+}$ | 118                                           | 0.20                                      | 3.7               | 4.1                    |
| Meso $\text{YPO}_4:5\%\text{Ce}^{3+}$ | 104                                           | 0.30                                      | 3.9               | 3.0                    |
